# Supplementary material
Source: publisher site journal article supplement (https://www.degruyterbrill.com/publication/journal_key/PSYCH/downloadAsset/PSYCH_CFP%20Call%20for%20Edited%20Volumes.pdf)
Supplement: Supplementary file 1 [file PSYCH_CFP%20Call%20for%20Edited%20Volumes.pdf]

## CALL FOR PROPOSALS FOR TOPICAL ISSUES "OPEN PSYCHOLOGY" vol. 2026

"Open Psychology" ([www.degruyterbrill.com/psych](http://www.degruyterbrill.com/psych)) - an open access journal published by De Gruyter - invites groups of researchers, conference organizers and individual scholars to submit their proposals for edited volumes, to be considered for publication as special issues of the journal.

Potential proposals may refer to a broad range of subjects, including, but not restricted to:

- Cognitive psychology (perception and attention; memory and learning; language; thinking and reasoning; cognition and emotion)
- Social psychology (attitudes, attribution and social cognition; group processes, self and identity; social influence and social dynamics; close relationships; personality and individual differences)
- Developmental psychology (cognitive development; social and emotional development; language development)
- Health and clinical psychology
- Occupational and business psychology
- Educational and school psychology
- Comparative psychology

Proposals will be collected by October 31, 2025.

Proposals including title of the special issue, its short description, information about editors, proposed text of call for papers and/or list of potential contributions will be collected by Dr Katarzyna Tempczyk at [katarzyna.tempczyk@degruyterbrill.com](mailto:katarzyna.tempczyk@degruyterbrill.com)

Find us on Facebook: <https://www.facebook.com/DGOpenPsychology>
